Bond's results re-emphasize the importance of the nanoplankton in the food of the zooplankton and also indicate the possible influence on the increase of the nanoplankton of the dissolved organic matter. This is as it should be. There can be no question as to the fundamental importance of the nanoplankton in the food chains in the sea. Further work along these lines is one of the most urgent needs of marine biology.

C. M. Yonge.

### Reviews of recent Russian literature.

By

Prof. A. L. Behning.

**E. S. Sinova.** "Les algues de Kamtschatka." Explor. des mers d'U.R.S.S. Fasc. 17, 7—42. Leningrad, 1933.

Auf Grund der Bearbeitung eines reichhaltigen Materials, welches namentlich in den Jahren 1929—1930 von den Expeditionen des Hydrologischen Institutes und des Wissenschaftlichen Forschungs-Institutes in Wladiwostok eingesammelt worden ist, beschreibt die Verfasserin 73 Algenarten (Chlorophyceae, Schizophyceae, Phaeophyceae, Rhodophyceae), von welchen besonders hervorgehoben seien: *Chlorochytrium schmitzii*, *Dermocarpa prasina*, *Nitophyllum ruthenicum*, *Phymatolithon compactum*, *Iridaea phyllocarpa*, *Iridaea pustulosa*, *Delesseria alata*, *Delesseria spinulosa*, *Laminaria dentigera*, *Laminaria longipes*, *Alaria fistulosa*, *Alaria pylaii*. Die in grossen Mengen in der Bucht von Awatschinsk vorkommenden grossen Formen von *Laminaria* und *Alaria* (bis 5 m. Länge bei einer Breite von bis 40 cm.) spielen eine grosse Rolle als Ausfuhrobjekte nach China. Die bei den Karaga-Inseln massenhaft auftretenden *Ptilota* zeigen einen Jodgehalt von 0.19—0.27 %.

**L. K. Losina-Losinsky.** "Die Pantopoden der östlichen Meere der USSR." Explor. des mers d'U.R.S.S. Fasc. 17, 43—80. Leningrad, 1933.

Verfasser hat die grosse Ausbeute des Hydrologischen Institutes und der Fischerei-Station in Wladiwostok (1925—1931) bearbeitet. Es werden beschrieben: *Lecythorhynchus marginatus*, *Halosoma derjugini*, *Ammothea alaskensis*, *Phoxichilidium femoratum*, *Nymphon longitarse*, var. *brevicollis*, *Nymphon grossipes*, *Nymphon brevicirstre*, *Nymphon hodgsoni*, *Nymphon striatum*. Als neue Arten erwiesen sich: *Pycnosoma* (gen. nov.) *strongylocentroti*, *Ammothea laurentii*, *Ammothea uschakovi*, *Ammothea litke*, var. *intermedia*, *Ammothea echinata* subsp. *orientalis*, *Ammothea borealis* subsp. *japonica*, *Ammothea gracilipes* var. *borealis*, *Nymphon uniunguiculatum*.

Diese Befunde zeigen uns wieder eine Reihe von Formen, welche auf eine Ähnlichkeit zwischen den Organismen der nördlichen Breiten des Stillen und des Atlantischen Ozeans hinweisen. Einige hier gefundene Bewohner der Tropenregion leben ausschliesslich in grossen Tiefen, dagegen zeigen einige Flachwasserbewohner auf eine Ähnlichkeit zwischen der Fauna des Stillen Ozeans und derjenigen des Mittelmeers, Atlantischen Ozeans und der Barents-See.

**H. Broch.** "Über einige geographisch interessanten Fundstellen von Alcyonarien und Hydrokorallen im nördlichen Stillen Ozean." Explor. des mers d'U.R.S.S. Fasc. 17, 81—86. Leningrad, 1933.

Beschrieben werden *Eunephthya rubiformis*, *Eunephthya fruticosa* und *Stylaster boreopacificus* nov. sp. Die Fundstellen der beiden Alcyonarien — Ochotskisches Meer — erweitern gegen Süden stark die bisher bekannten Lebensbezirke. Die neue *Stylaster*-Art aus der Japan-See ist nahe verwandt der atlantischen *St. norvegicus*.

**Eu. F. Gurjanowa.** "Contribution to the Isopoda fauna of the Pacific Ocean." Explor. des mers d'U.R.S.S. Fasc. 17, 87—106. Leningrad, 1933.

Die grosse Ausbeute aus den Gewässern des Stillen Ozeans (Ochotskisches Meer, Bering Meer, Japanisches Meer), welche die Verfasserin gegenwärtig bearbeitet, birgt eine Anzahl interessanter neuer Arten. Hier werden beschrieben: *Arcturus ulbani*, *A. setosus*, var. *seminudus*, var. *acuticaudalis*, *A. crenulatus*, *Idothea derjugini*, *I. aleutica*, *I. orientalis*, *I. ochotensis*, *Synidothea bicuspidata* subsp. *lata*, *S. longicirra*, *S. cinerea*, *S. spinosa*, *S. brazhnikovi*, *S. excavata*, *Tecticeps glaber*, *T. renoculis* var. *carinatus*, *Exosphaeroma ovata*, *Ligia cinerascens*.

**M. I. Markun.** "Die Aralsee-Barbe, ihre Systematik und Biologie." Rep. of the Aral-Sea division of the Sci. Inst. of Marine Fisheries, II, 1—48. Aralsk, 1933.

Im Aralsee finden wir das Hauptverbreitungsgebiet der Barbe, welche hier jährlich in Mengen bis zu etwa 1700 metr. tons erbeutet wird. Es leben im Gebiet 2 Arten: *Barbus brachycephalus* Kessl. und *B. capito conocephalus* Kessl., jedoch kommt nur der ersten eine wirtschaftliche Bedeutung zu. Verfasser berichtet über seine morphometrischen, biologischen und fischereiwirtschaftlichen Untersuchungen. Wir haben hier einen Wanderfisch vor uns, welcher zum Laichen in die Flüsse (namentlich die Amu-Darja) aufsteigt. Die Frühjahrswanderung, im März—April, ist kurz, intensiver und länger die Sommerwanderung, im Juli—August. Mittlere Grösse der Wanderfische: Weibchen-74 und Männchen-67 cm., Gewicht 6.4, bzw. 4.5 kg. Als Nebenfang trifft man den sogen. "Panachan", welcher durch seinen niedrigen Körper und Kopf ausgezeichnet ist; bei gleich grosser Länge wiegen diese nur 38.5 % der normalen Form. Es sind das schon abgelaichte und stark abgehungerte Fische. Der Hauptfang dieses Fisches erfolgt in den Gebieten des südlichen Teiles des Meeres.

**S. I. Jagudina.** "Dynamik des Fischfanges am Aralsee in den Jahren 1929 bis 1931." Rep. of the Aral-Sea division of the Sci. Inst. of Marine Fisheries, II, 49—102. Aralsk, 1933.

Der gesamte Fangertag beträgt in den letzten Jahren ca. 400,000 Zentner, die grösste Rolle spielen in den Fängen Blei (*Abramis brama*) und Karpfen (*Cyprinus carpio*), welche zusammen 50—60 % des Gesamtfanges ausmachen. Ferner folgen die Plötze (*Rutilus rutilus aralensis*), der Wels (*Silurus glanis*), der Hecht (*Esox lucius*), Schemaja (*Chalcalburnus chalcoides*) und die Barbe (*Barbus brachycephalus*). Ein Abnehmen zeigen die Fänge der einzigen hier im Meere lebenden Störart, *Acipenser nudiventris*.

**B. S. Iljin.** "Biocoenose des halistatischen Gebiets des Schwarzen Meeres." Priroda, 7, 63—65. Leningrad, 1933.

Verfasser berichtet über einige Befunde, welche er als Mitglied der Schwarzes-Meer-Expedition Knipowitsch's gemacht. Die weit von den Ufern entfernten Gebiete des Meeres sind durch eine Reihe charakteristischer und sonst hier im Meer nie oder nur selten anzutreffender Formen gekennzeichnet: *Idothea algerica*, *Syngnathus schmidtii*, *Nautilograpsus minutus* und *Gasterosteus aculeatus*. Die Formen wurden zwischen Zosteramassen und diversen pflanzlichen Anschwemmungen oder auch freischwimmend gefunden und sind als meist speziell diesem Lebensbezirk angepasste Organismen zu bezeichnen: gutes Schwimmvermögen der Krebse, Körperauswüchse bei *Syngnathus*, typische Meereseinfärbung von *Gasterosteus* — oben bläulich schimmernd und die Bauchseite silberglänzend. Die hier vorliegenden Milieuverhältnisse sind: geringe Wasserbewegung, grosse Wasserdurchsichtigkeit, festes Substrat nur in Form von schwimmenden *Zostera* und anderen Pflanzenresten.

**G. F. Uhl.** "Zur Frage über die Navigationsklassifikation der Küstenmeerboden." Explor. des mers d'U.S.S.R. Fasc. 16, 1—22. Leningrad, 1932.

In der letzten Zeit sind in der U.S.S.R. verschiedene Vorschläge zur Unifikation der Bodenartenklassifikation gemacht worden, so z. B. von Messer, 1930, Gluschkoff, 1930, Derjugin, 1928. Verfasser resümiert seine im allgemeinen mit den genannten summierenden Ansichten folgendermassen:

| Klasse | Morpholog. Eigenschaften | Bestimmung                         | Durchmesser der einzelnen Teile |
|--------|--------------------------|------------------------------------|---------------------------------|
| 1      | Plastisch                | Ton                                | < 0.001 mm                      |
| 2      | Staubig                  | Schlamm                            | 0.1—0.001 mm                    |
| 3      | Körnig                   | Sand                               | 0.1—0.3 mm                      |
| 4      | Einzelkörnig             | Kies                               | 10—1 mm                         |
| 5      | Agglomerat               | Gerölle, grosse und kleine Steine  | 100—10 mm                       |
| 6      | Scheuersteine und Blöcke | Grosse Steine                      |                                 |
| 7      | Massiv                   | Fester Boden, Quadergestein        |                                 |
| 8      | Organogen                | Muscheln, Eisen-, Magnesia Knollen |                                 |
| 9      | Tierische Organismen     | Schwämme, Korallen, Lithothamnien  |                                 |
| 10     | Pflanzliche Überzüge     | Gras, Algen                        |                                 |

**L. Retowski** "Beobachtungen an marinen Kleingewässern der Murmanküste". Trans. Arctic Inst., III, 2, 29—46, Leningrad, 1933.

Verfasser stellte Beobachtungen über diverse sich als Resultat der Meeresfluten an den steilen Granitabhängen der Murmanküste bei Portschnicha bildenden Kleingewässern an. Er teilt sie ein:

- I. Periodisch vom Meer überflutete
  - a) 11 Stunden unter dem Meeresspiegel, 1 Stunde frei,
  - b) je 6 Stunden unter Wasser und 6 St. frei,
  - c) 11 Stunden frei und 1 St. unter Wasser.

II. Nur bei Springflut von einzelnen Wellen überflutete Kleingewässer.

In den Gewässern I macht sich in der chemischen Wasserzusammensetzung kaum ein Unterschied zwischen derjenigen des Litorals bemerkbar, dasselbe gilt bei I a auch für die Fauna. In den Gewässern I b bemerkt man eine besonders reiche Fauna, namentlich aus *Mytilus edulis*, *Littorina rudis* und *Balanus balanoides* bestehend. I c ist arm an Organismen, scheinbar durch die Temperaturverhältnisse bewirkt. Die Gewässer II stellen sich als stark in hydrologischer Hinsicht modifizierende Gebilde dar (starker Salzgehalt, Abhängigkeit der Wassertemperatur von der Lufttemperatur, besonderer Gasgehalt), dementsprechend sind die Lebensverhältnisse hier eng beschränkt.

Ferner wird noch kurz über die durch Süßwasser gebildeten Gewässer berichtet, welche jedoch noch unvollständig erforscht sind.

**E. Bajarunass.** "Zur Frage über die Bestimmung des Chlorkoeffizienten im Wasser des Schwarzen Meeres". Hydrochem. Materialien, VIII, 82—86. Nowotscherkassk, 1932.

Wie bekannt, verhalten sich in unseren grossen Binnenmeeren und z. T. auch noch im Schwarzen Meere die einzelnen Salzbestandteile anders zueinander als das gewöhnlich im Ozeanwasser der Fall ist. Namentlich verschieden sind hier, und zwar viel höher, die Sulphate. Deshalb erscheinen beim Bestimmen des allgemeinen Salzgehalts nach den üblichen Chloranalysen auf Grund der bewährten Hydrographischen Tabellen von Knudsen hierselbst gewisse Schwierigkeiten, die es in einzelnen Fällen ganz unmöglich machen die Tabellen zu benutzen.

Verfasserin hat nun die Gewichtsbeziehungen des trockenen Rückstandes zum Chlorgewicht im Wasser des nordöstlichen Teiles des Schwarzen Meeres untersucht, mit Anwendung einer von E f r e m o f f eingeführten Methode zur Bestimmung des Trockenrückstandes (Abdampfen mit Soda) und stellt dabei den mittleren Chlor-Koeffizient für dieses Wasser gleich 1.8154 fest, mit Schwankungen zwischen 1.7911 und 1.8307.

Ähnliche Bestimmungen für den Kaspisee und besonders den Aralsee, wo wir einen noch viel grösseren Gehalt an Sulphaten im Meerwasser haben, sind sehr erwünscht und zeitgemäss.

**N. M. Knipowitsch.** "Hydrologische Untersuchungen im Asowschen Meere". Abh. d. wiss. Fischerei-Exped. im Asowschen und Schwarzen Meer, L. 5, 1—496. Moskau, 1932.

Der Senior der russischen Hydrologen berichtet hier über seine 1922—1926 und z. T. auch noch 1927—28 ausgeführten grossangelegten Untersuchungen der hydrologischen und hydrobiologischen Verhältnisse unserer südlichen Meere. Dieser Band ist speziell dem Asowschen Meer gewidmet. Die einzelnen Kapitel sind: Lage und Oberfläche des Meeres; Bodenrelief; Niveau; allgemeine hydrologische Verhältnisse; Wassertemperatur; Salinität; Gasverhältnisse; Wasserdurchsichtigkeit; Eisverhältnisse; Strömungen im Asowschen Meere; Rolle der hydrologischen Faktoren in der Biologie und Fischerei dieses Meeres; Existenzbedingungen der Fische und die Fischerei. Wir haben hier ein Brackwassermeer vor uns mit einem Salzgehalt von ungefähr 10.5—11.5 ‰, in dem die Gefriertemperatur niedriger ist als diejenige der maximalen Dichte. Daraus erfolgt, dass sich hier in den Bodenschichten bei stillem Wetter im Herbst relativ hohe Wassertemperatur längere Zeit erhalten kann. Die vertikale Zirkulation verläuft hier in vier verschiedenen Formen: 1) durch Temperaturzunahme, ohne Veränderungen

im Salzgehalt, 2) durch ebensolche Abnahme der Temperatur, 3) durch Temperaturzunahme mit Salzgehaltserhöhung infolge von Verdunstung und 4) durch Temperaturabnahme bis zum Gefrierpunkt mit Salzgehaltszunahme infolge von Salzausscheidung bei der Eisbildung. Dank der nur geringen Tiefe (mittlere Tiefe 7.22 m.; Tiefen von 10—13.25 m. nehmen nur 50.23 % der Oberfläche ein) werden bei Wind alle Wasserschichten vermischt, durchgreifend beleuchtet und dank der besonderen Lage erfolgt ein grosser Zufluss vom Land her, welcher infolge der Mengen von eingeführten organischen und anorganischen Stoffen in gelöstem und ungelöstem Zustande eine mächtige Entwicklung des organischen Lebens hierselbst ermöglicht. Plankton und Benthos zeigen im allgemeinen eine geringe qualitative, jedoch reiche quantitative Entwicklung. Es sind zumeist Mischformen, welche dieselben bilden: *Chaetoceras*, *Rhizosclenia*, *Skeletonema*, *Microcystis*, *Anabaena*, *Prorocentrum*. u. a. des Phytoplanktons; *Synchaeta vorax* und *baltica*, übliche Süsswasserrotatorien und die pontokaspischen Centropagiden (*Evadne* und *Cercopagis*), sowie *Acartia latisetosa* und *A. clausi* u. a. des Zooplanktons; Tubificiden, Chironomidenlarven, Hypania, Cardium, Syndesmya, Hydrobia, Gammariden, Cumaceen u. s. w. des Benthos — sind Formen, welche hier eine grosse Entwicklung erreichen und z. T. in enormen Mengen auftreten, namentlich in den der Nord- und Ostgrenze des Meeres naheliegenden Gebieten.

Die Ichthyofauna des eigentlichen Asowschen Meeres mit den Flussmündungen mitgerechnet setzt sich aus insgesamt 115 Arten zusammen, von denen 82 im Meere vorkommen. Zählt man jedoch dabei die seltenen oder nur im Süsswasser, oder umgekehrt nur vereinzelt vom Meere her einwandernden Arten nicht mit, so erhalten wir die eigentlich typische Asowsche Fischfauna aus 58 Arten bestehend, von welchen 18 anadrome Formen, welche regelmässig zum Laichen die Flüsse heraufsteigen, sind und zwar: *Huso huso*, *Acipenser nudiventris*, *A. güldenstädti*, *A. stellatus*, *Caspialosa tanaica*, *C. pontica*, *Cyprinus carpio*, *Pelecus cultratus*, *Vimba vimba*, *Blicca björkna*, *Abramis brama*, *A. sapa*, *A. ballerus*, *Alburnus chalcoides*, *Aspius aspius*, *Leuciscus frisii*, *Rutilus rutilus heckeli*, *Lucioperca lucioperca*. Die einzelnen Arten verhalten sich natürlich verschiedenartig gegenüber dem Salzgehalt, der Temperatur und anderen hydrologischen Verhältnissen. Die Ernährungsverhältnisse der Fische sind im allgemeinen recht günstig und zwar nicht nur für die typisch Asowschen Fische, sondern z. T. auch für einige, welche aus dem Schwarzen Meer speziell zur Ernährung zeitweilig hierher wandern. Der jährliche Fischereiertrag des Asowschen Meeres und der in dasselbe einmündenden Flüsse betrug 1913 ca. 33,500 Tonnen.

Eine Anzahl Tabellen, Karten und hydrologische Profile erläutern diese grossangelegte und gegenwärtig für das Asowsche Meer einzig dastehende Arbeit.
